# Supplementary material
Source: publisher figshare collection journal article supplement (https://acs.figshare.com/ndownloader/files/17961812)
Supplement: Supplementary file 1 [file 17961812]

Supporting information for

Printability and critical insight into polymer properties during direct-extrusion based 3D printing of medical grade polylactide and copolyesters

Shubham Jain<sup>1</sup>, Tiziana Fuoco<sup>1</sup>, Mohammed Ahmad Yassin<sup>2</sup>, Kamal Mustafa<sup>2</sup> and Anna Finne-Wistrand<sup>1\*</sup>

<sup>1</sup>*Department of Fibre and Polymer Technology, KTH Royal Institute of Technology, Teknikringen, 56-58, SE 10044 Stockholm, Sweden*

<sup>2</sup>*Tissue Engineering Group, Department of Clinical Dentistry, Faculty of Medicine, University of Bergen, Norway. Årstadveien 19, 5009 Bergen, Norway*

*\*Author to whom all correspondence should be addressed*

Email: [annaf@kth.se](mailto:annaf@kth.se)

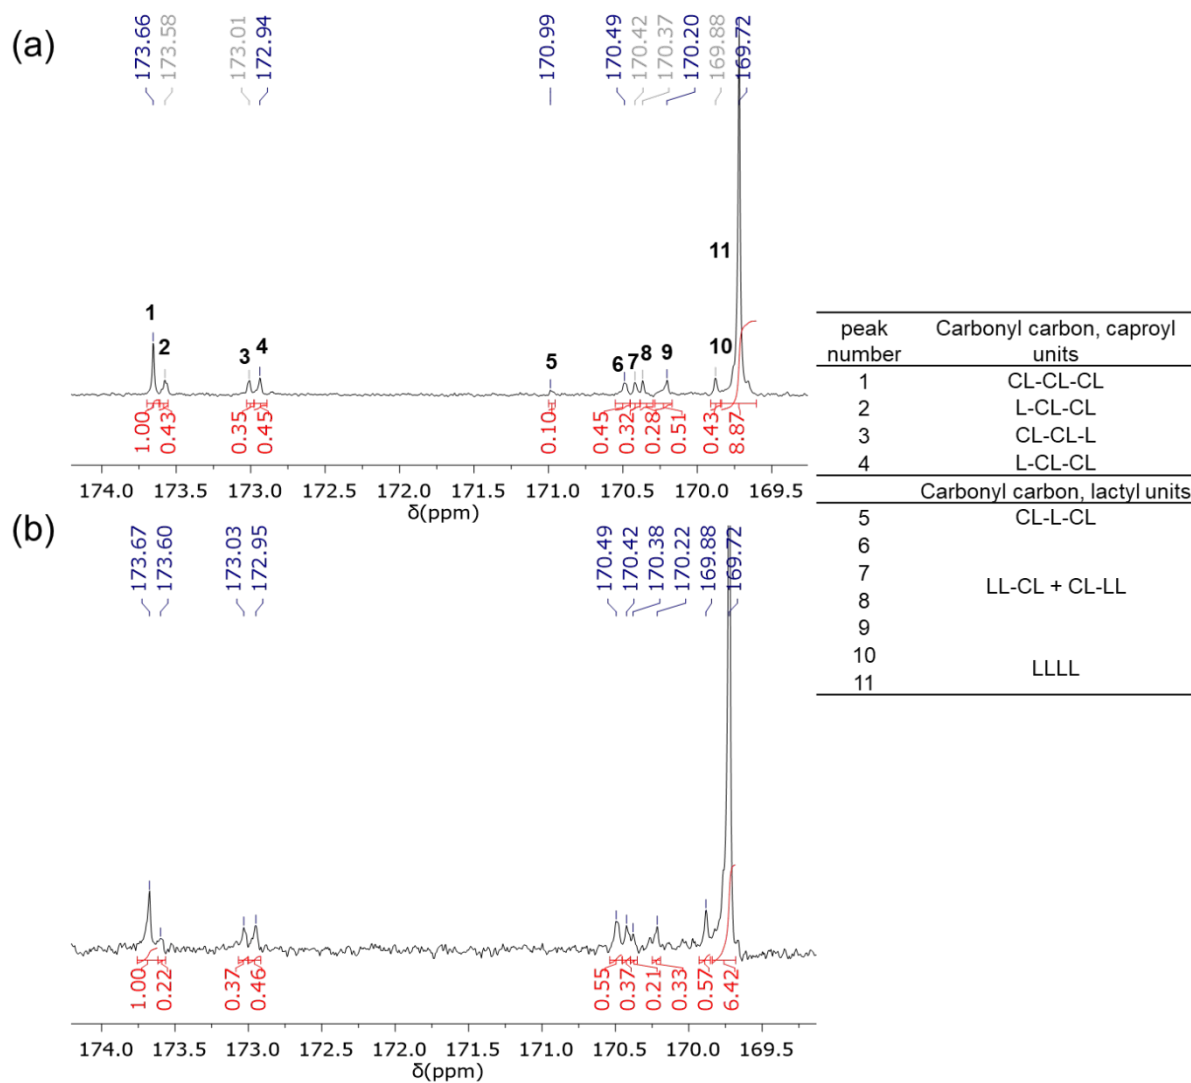

**Figure S1.** (a) Carbonyl region of  $^{13}\text{C}$  NMR spectra of PCLA raw material and (b) PCLA\_232.

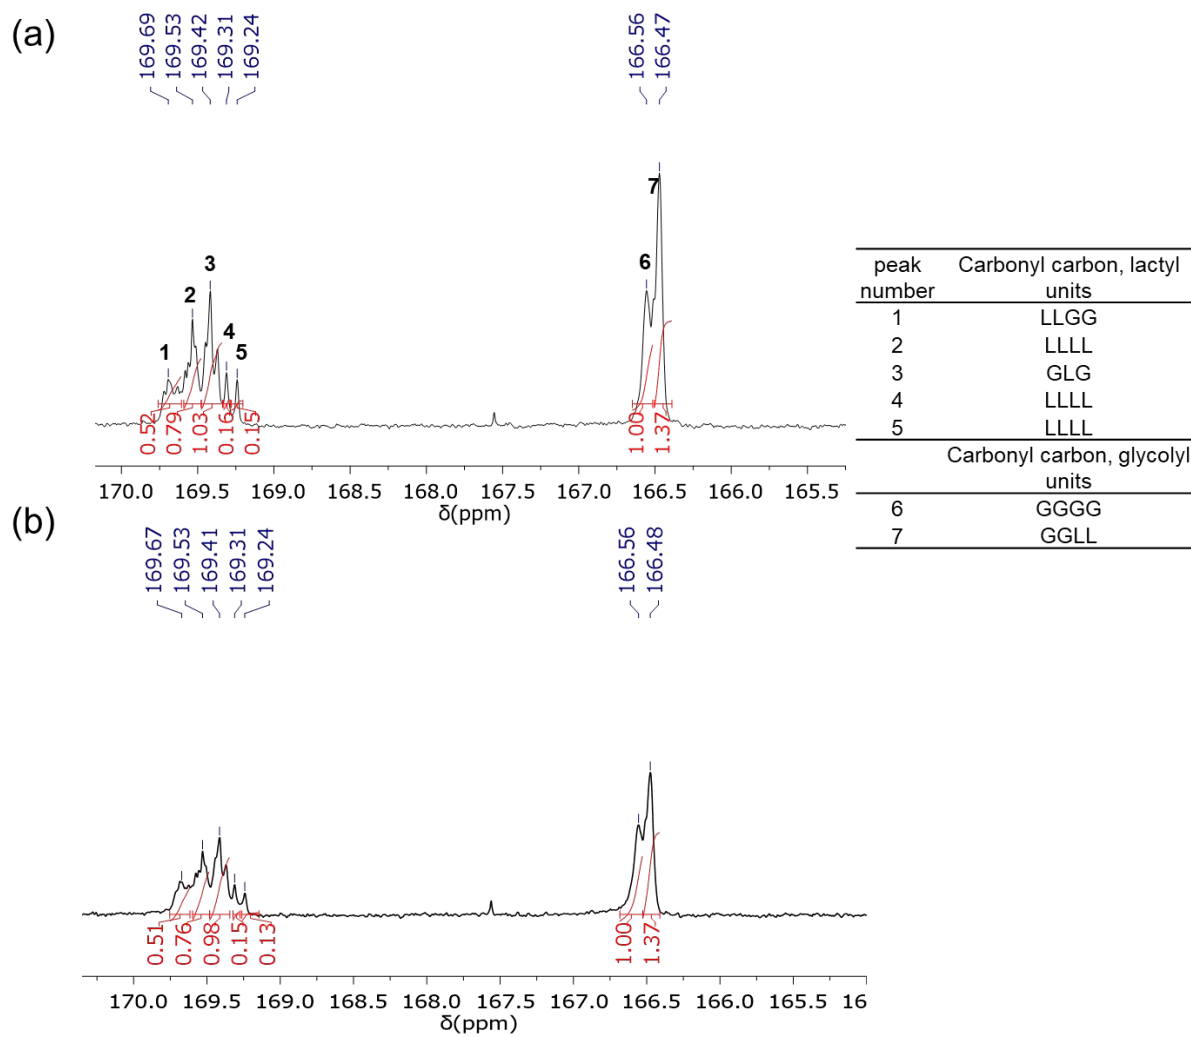

**Figure S2.** Carbonyl region of  $^{13}\text{C}$  NMR spectra of PDLGA raw material (a) and PDLGA\_328 (b).
